# Supplementary material
Source: PubMed Central journal article supplement (PMC5756513)

**Supplementary Data**  
**Conditional Loss of *Spata7* in Photoreceptors Causes**  
**Progressive Retinal Degeneration in Mice**

Aiden Eblimit<sup>1,2\*</sup>, Smriti Agrawal<sup>1,2\*</sup>, Kandace Thomas<sup>1,2</sup>, Anastassov Ivan Assenov<sup>3</sup>, Tajiguli, Abulikemu<sup>2,6</sup>, Graeme Mardon<sup>2,4,5§</sup>, Rui Chen<sup>1,2§</sup>

<sup>1</sup> Human Genome Sequencing Center, Baylor College of Medicine, Houston, TX 77030-3411, USA;

<sup>2</sup> Department of Molecular and Human Genetics, Baylor College of Medicine, Houston, TX 77030-3411, USA;

<sup>3</sup> Department of Biochemistry and Molecular Biology, Baylor College of Medicine, Houston, TX 77030-3411, USA;

<sup>4</sup> Department of Pathology and Immunology, Baylor College of Medicine, Houston, TX 77030-3411, USA;

<sup>5</sup> Department of Neuroscience, Baylor College of Medicine, Houston, TX 77030-3411, USA;

<sup>6</sup> The Key Laboratory of Plant Resources and Chemistry of Arid Zone, Xinjiang Technical Institute of Physics and Chemistry, Chinese Academy of Sciences, Urumqi, Xinjiang, China 830011

\*These authors contributed equally to the manuscript

§**Corresponding author information:**

Rui Chen, [ruichen@bcm.edu](mailto:ruichen@bcm.edu), Phone: +1- 713-798-5194, Fax: +1- 713-798-5741

Graeme Mardon, [gmardon@bcm.edu](mailto:gmardon@bcm.edu), Phone: +1- 713-798-8731, Fax: +1- 713-798-5838

## Supplementary Figures:

**Suppl. Figure 1. *In vivo* retinal imaging of *Spata7<sup>Flox/-</sup>; Crx-Cre* mouse.** Live imaging of *Spata7<sup>Flox/-</sup>; Crx-Cre* cKO mice by optical coherence tomography (OCT) at (A, B) 3 months, (C, D) 5 months, and (E, F) 7 months of age, reveal consistent, progressive thinning of the ONL compared to the age-matched *Spata7<sup>Flox/+</sup>* control retinas. The ONL is indicated by a red arrow head. ONL: outer nuclear layer; INL: inner nuclear layer; PR: photoreceptor layer.

## **Suppl. Figure 2. *Spata7* mRNA is expressed in the RPE.**

RT-PCR was performed on the RPE and the RPE+choroid isolated from adult wild-type mouse retinas, whole retinas from *Spata7<sup>+/-</sup>* mice, and *Spata7<sup>-/-</sup>* adult mice. *Spata7* is expressed in the RPE layer. Water was used as "blank control." GAPDH was used as a loading control. Primers flanking exons 1-5 were used to detect *Spata7* transcript.

## **Suppl. Figure 3. Expression of SPATA7 in *Spata7<sup>Flox/-</sup>; Crx-Cre* at postnatal day 6.**

Examination of SPATA7 expression by immunostaining shows few SPATA7-positive cells (green) in frozen retinal sections obtained from *Spata7<sup>Flox/-</sup>; Crx-Cre* mice at post-natal day 6 (P6). Arrows indicate SPATA7-positive cells. Nuclei were counterstained with DAPI. Scale bar = 10  $\mu$ m.

*Spata7<sup>Flox/+</sup>; Crx-cre*

*Spata7<sup>Flox/-</sup>; Crx-cre*

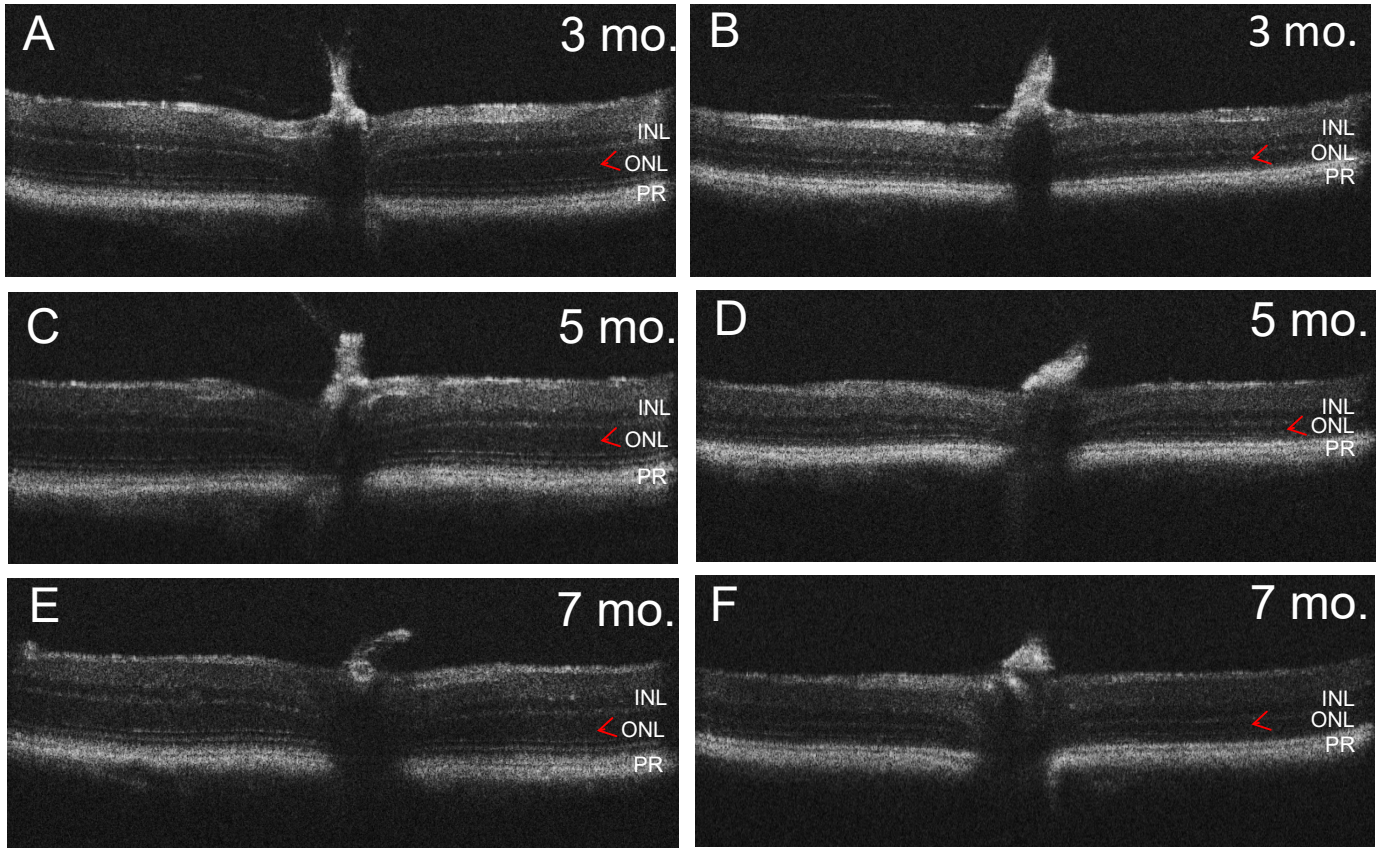

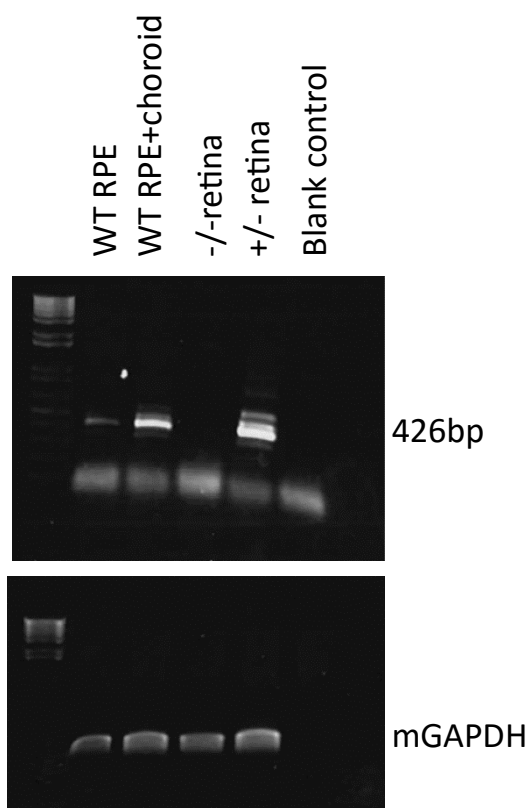

*Spata7<sup>Flox/+</sup>; Crx-Cre*

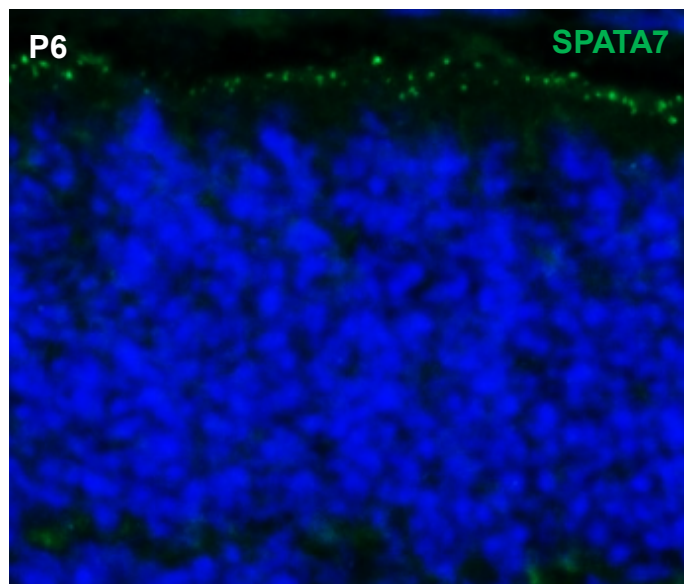

*Spata7<sup>Flox/-</sup>; Crx-Cre*

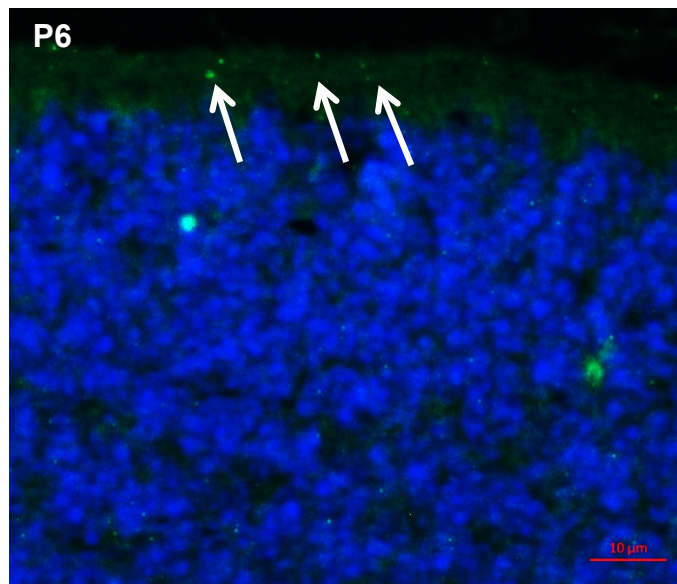

Supplement: NIHMS918212-supplement-3.pdf [file NIHMS918212-supplement-3.pdf]
