# Supplementary material
Source: PubMed Central journal article supplement (PMC5756513)

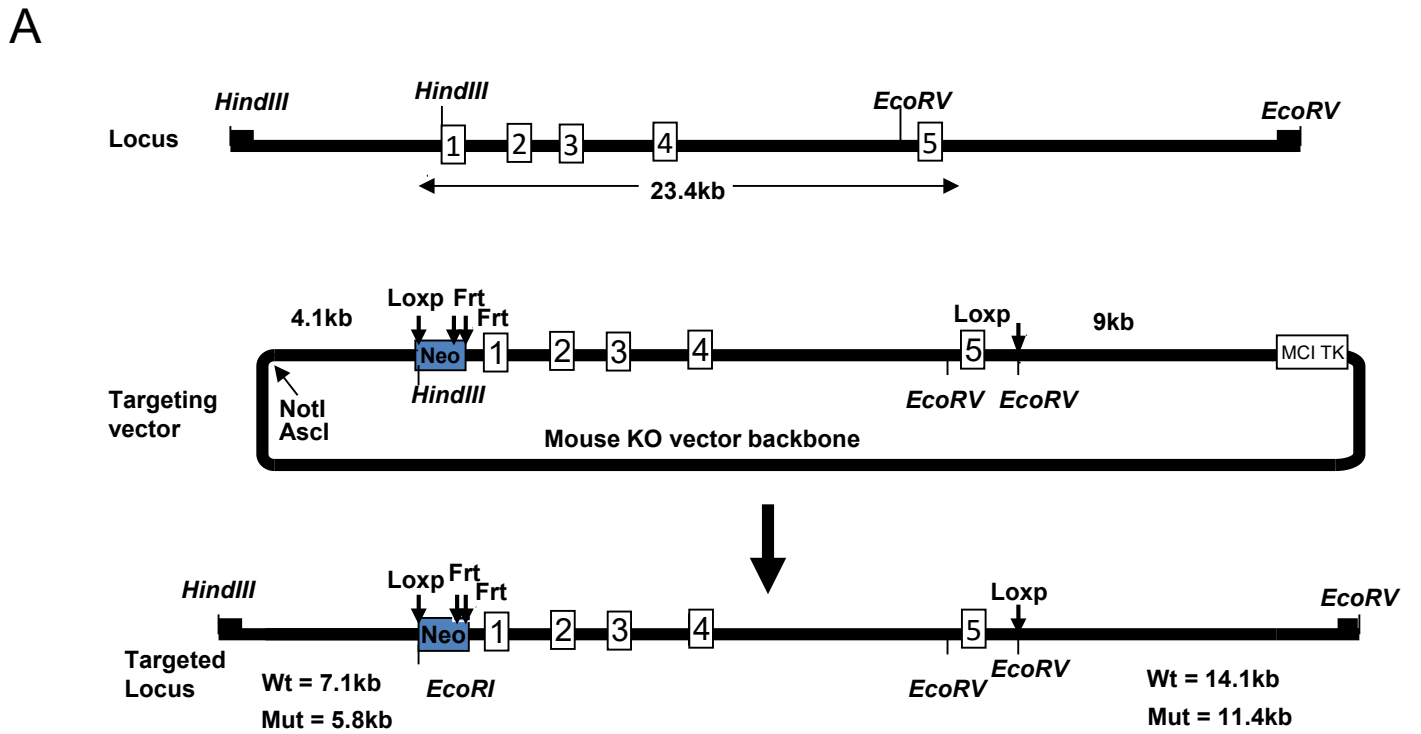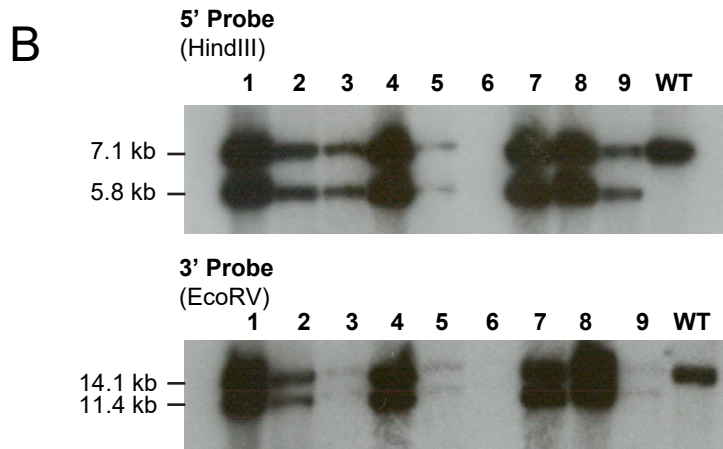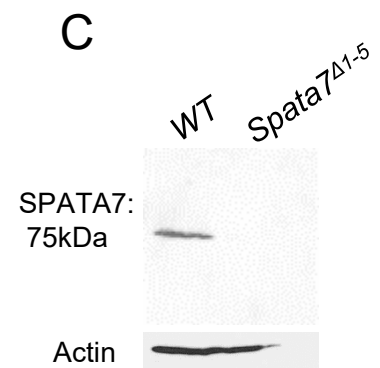

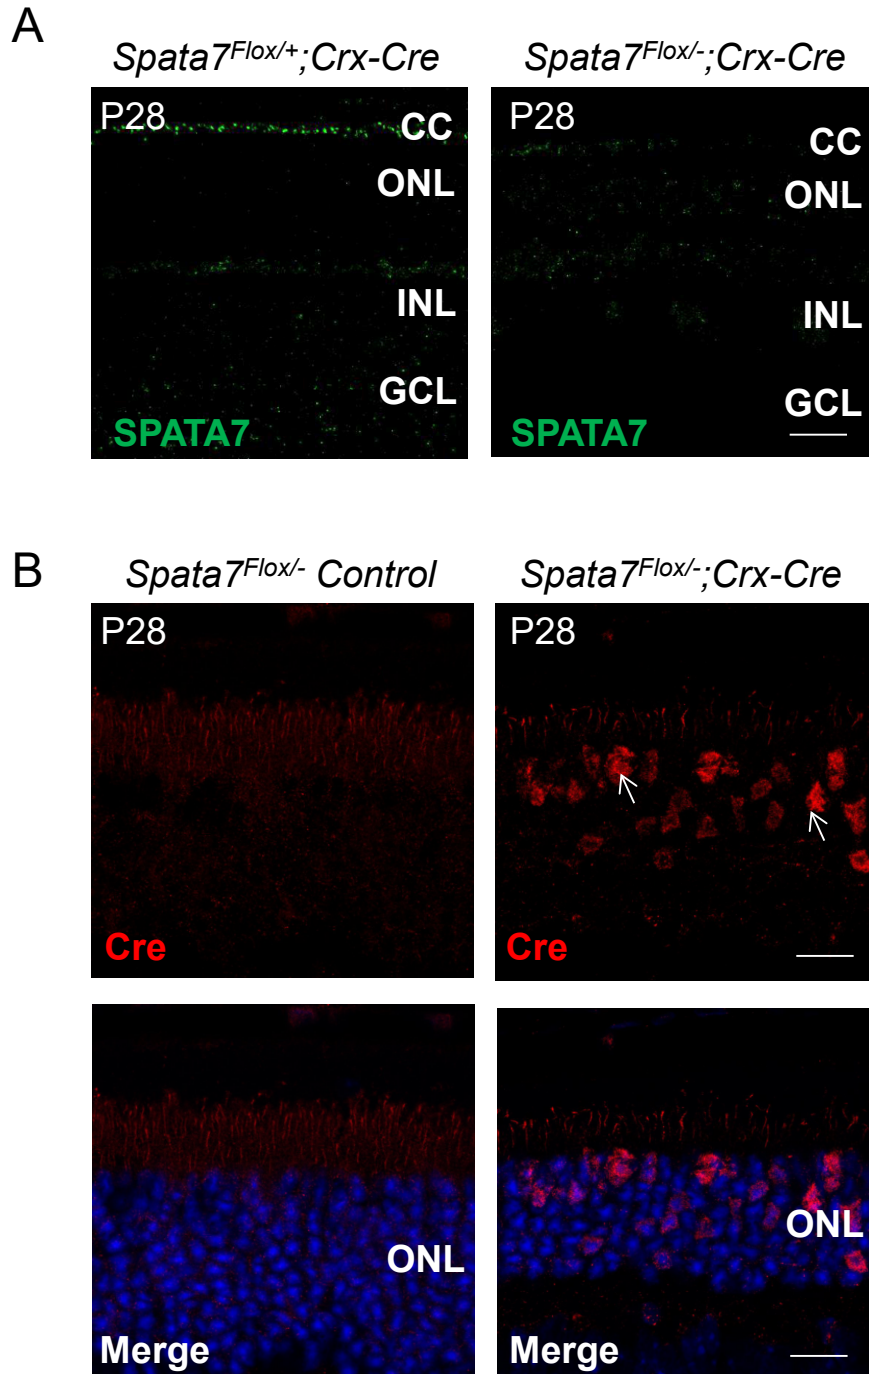

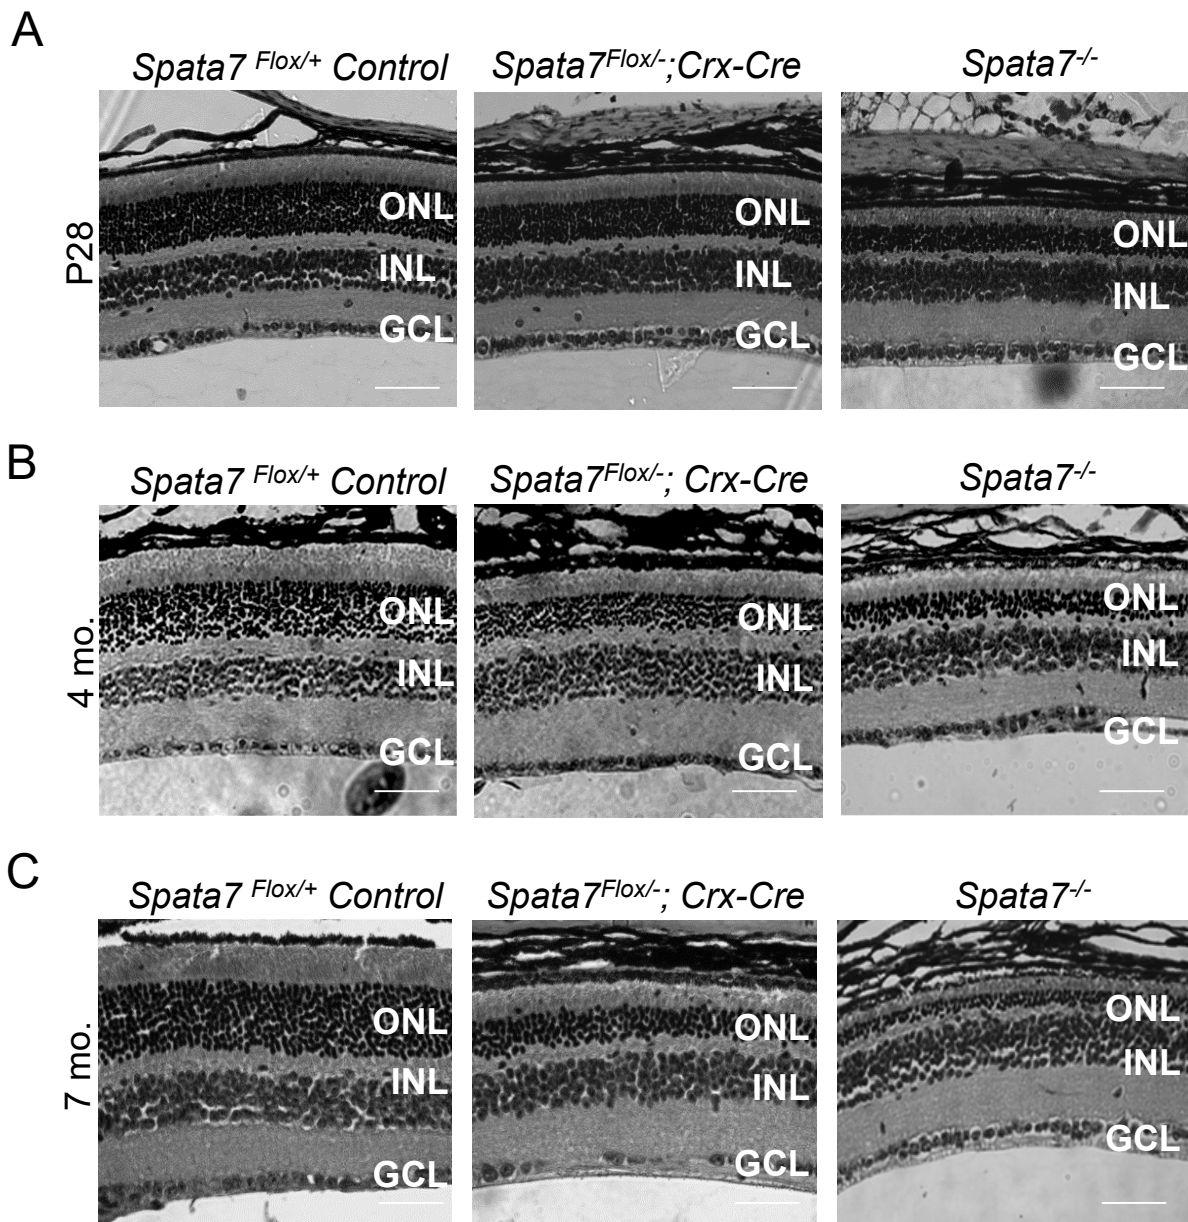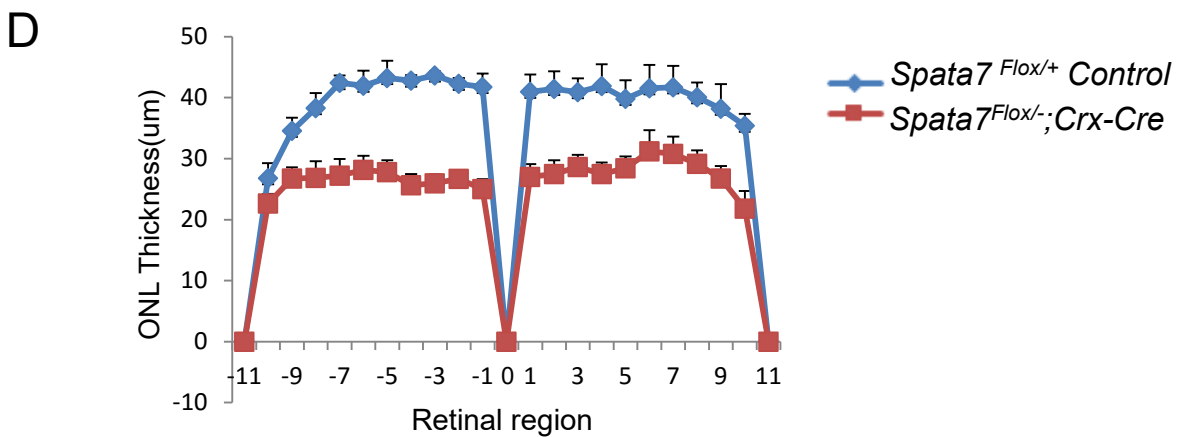

## 1 month

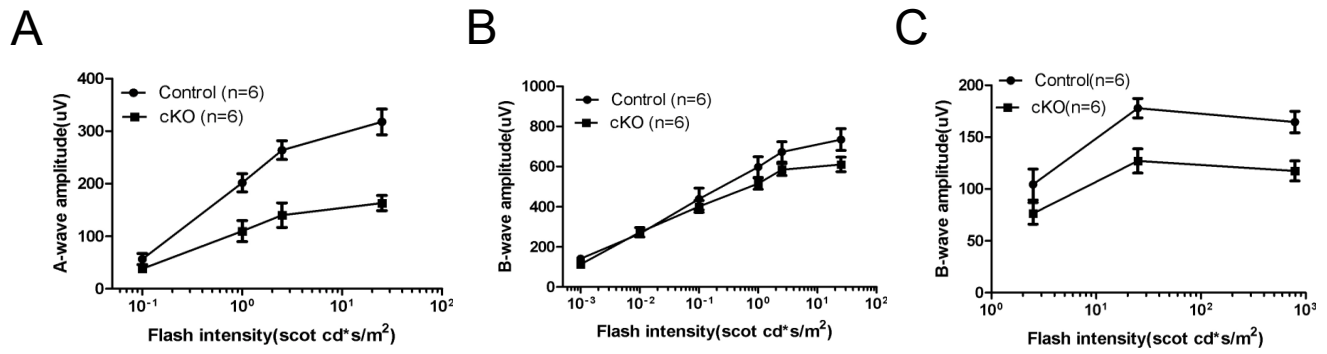

## 4 months

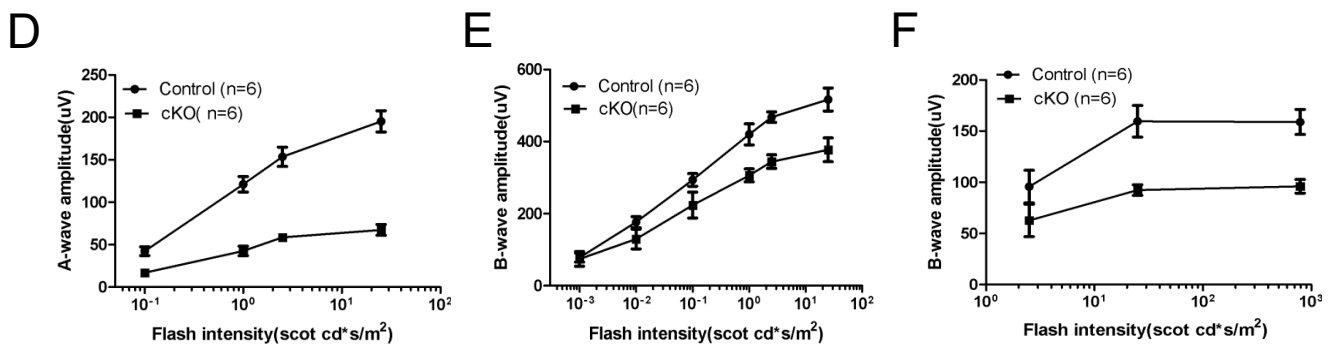

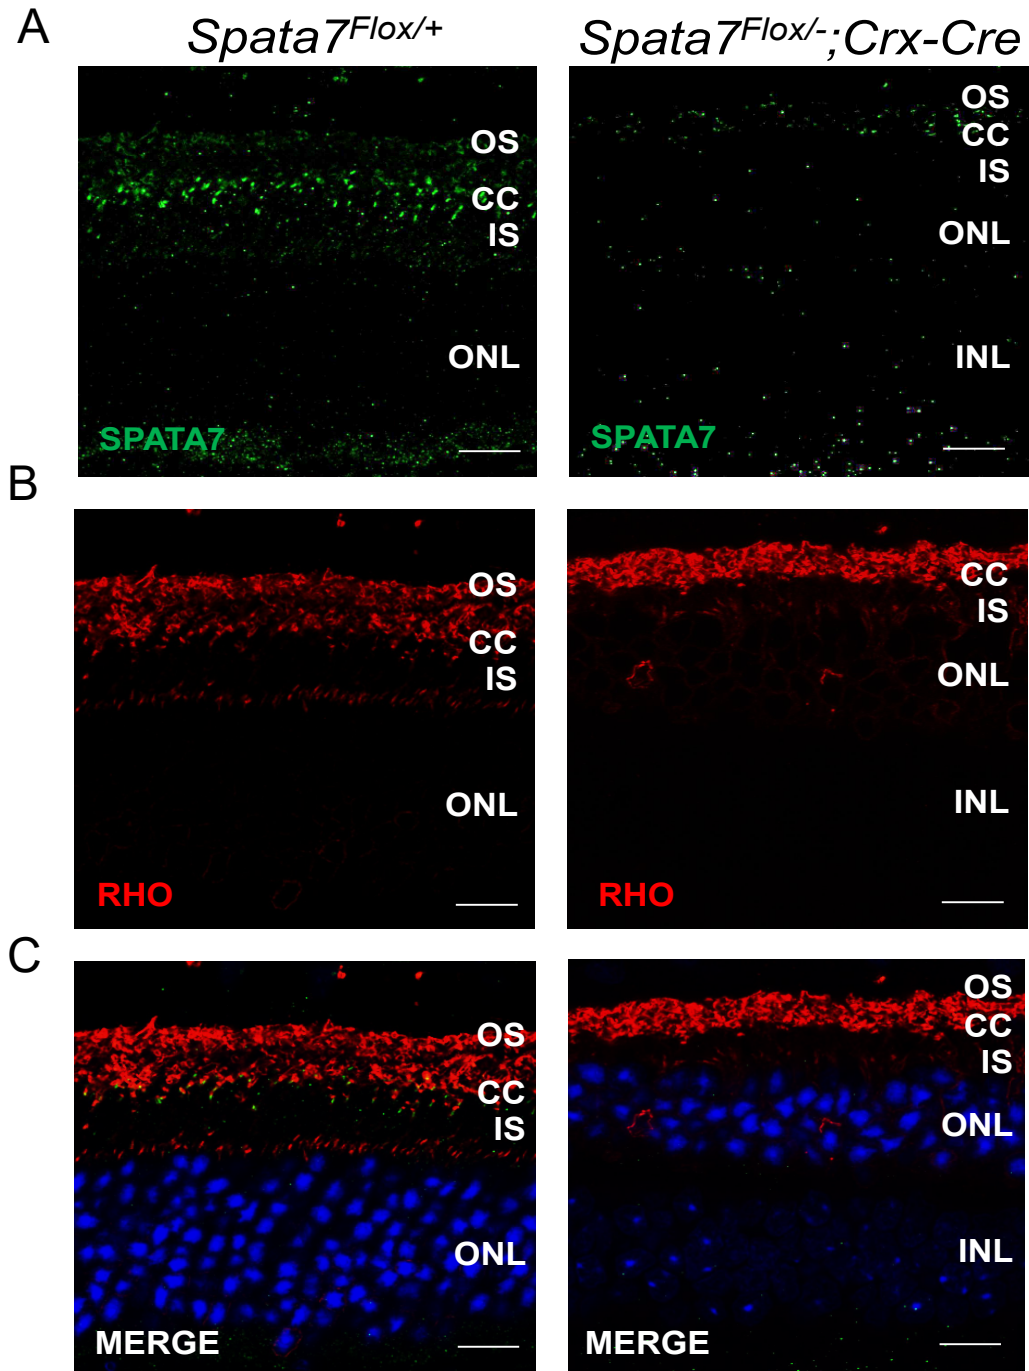

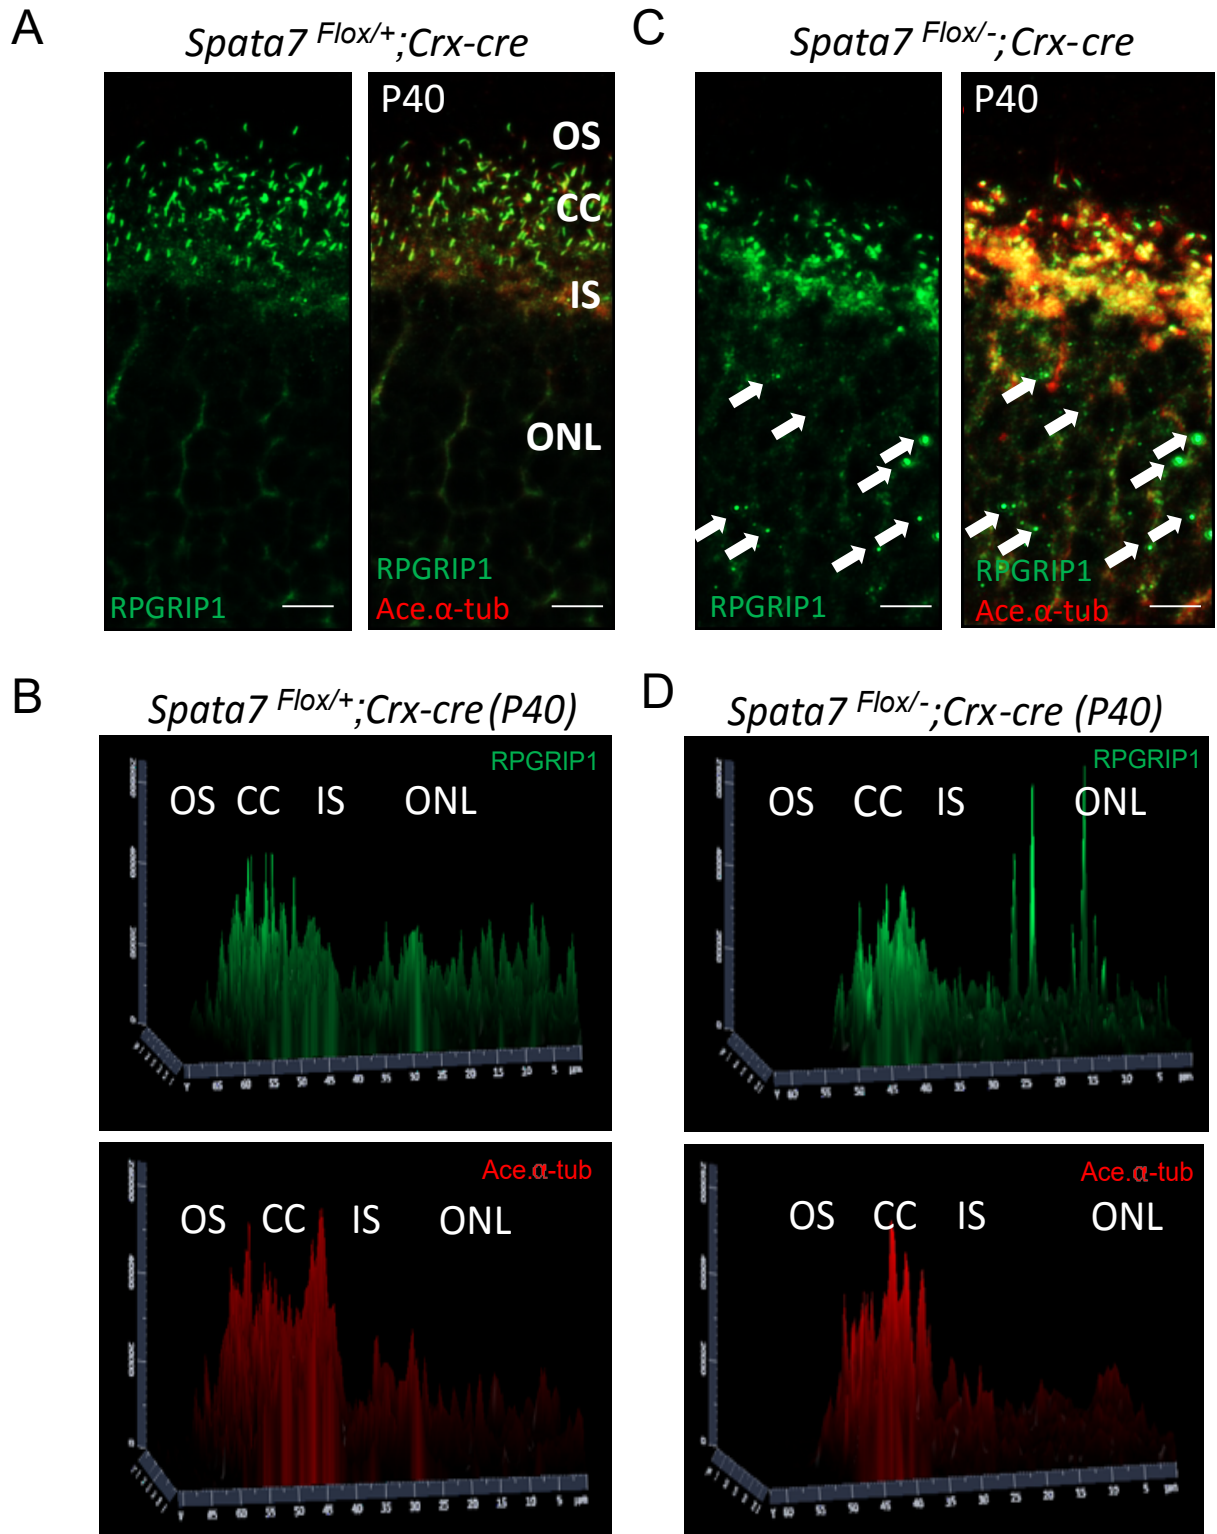

A

*Spata7<sup>Flox/+</sup>; Best1-Cre*

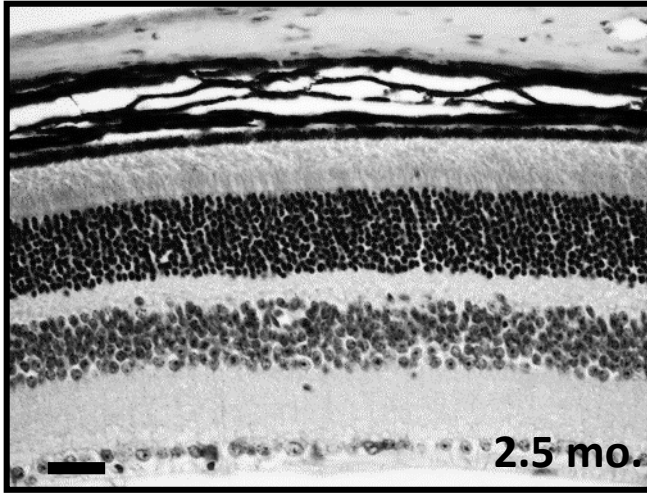

*Spata7<sup>Flox/-</sup>; Best1-Cre*

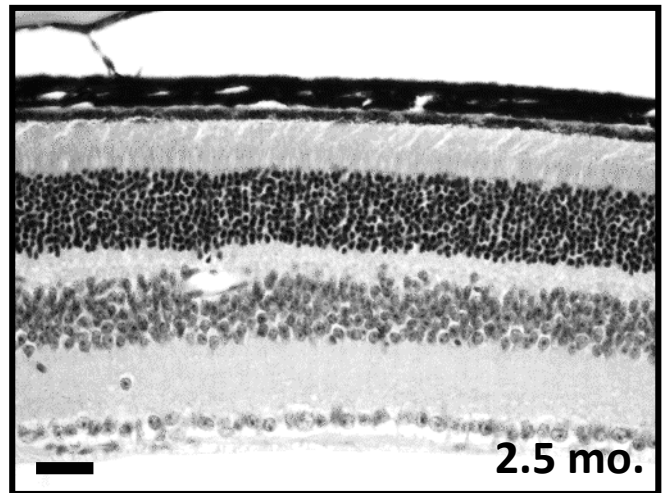

B

*Spata7<sup>Flox/+</sup>; Best1-Cre*

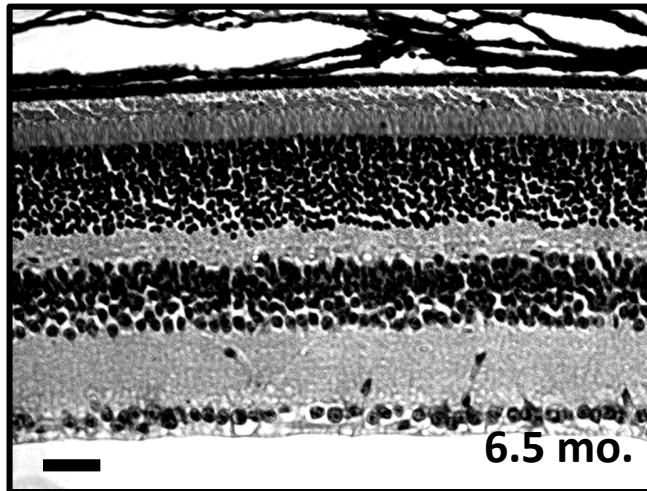

*Spata7<sup>Flox/-</sup>; Best1-Cre*

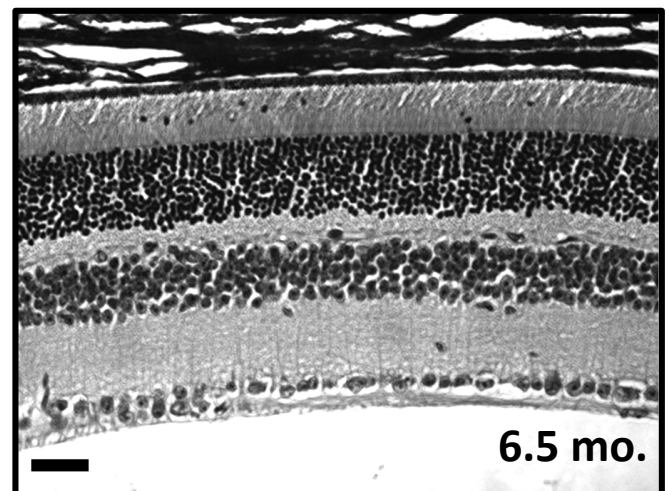

Supplement: NIHMS918212-supplement-2.pdf [file NIHMS918212-supplement-2.pdf]
