# Supplementary material
Source: PubMed Central journal article supplement (PMC5756513)

A

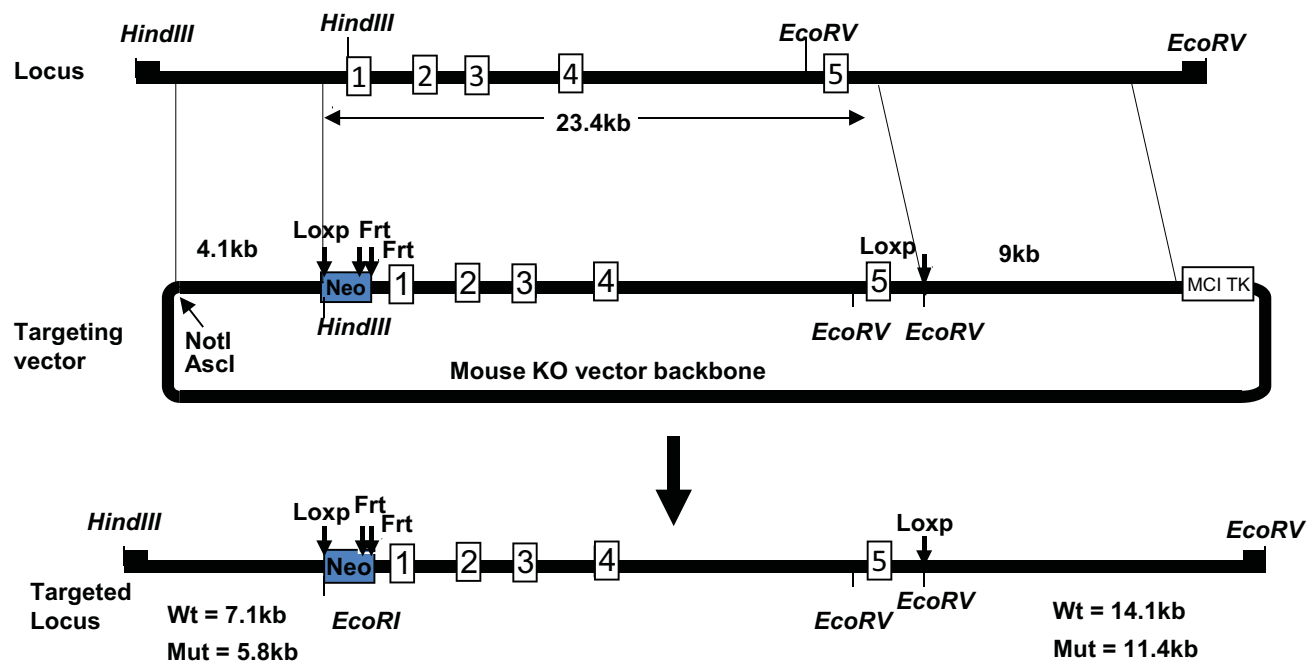

B

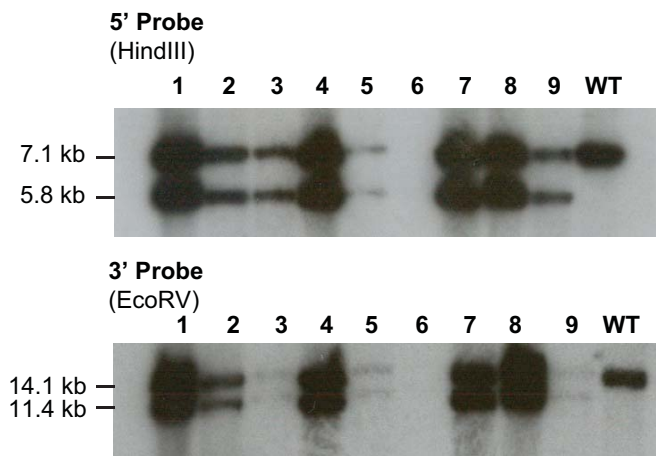

C

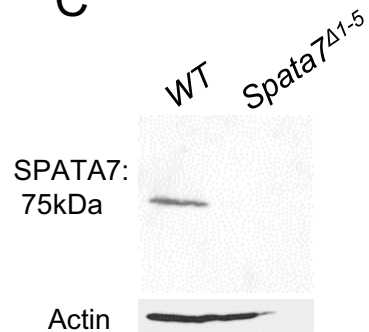

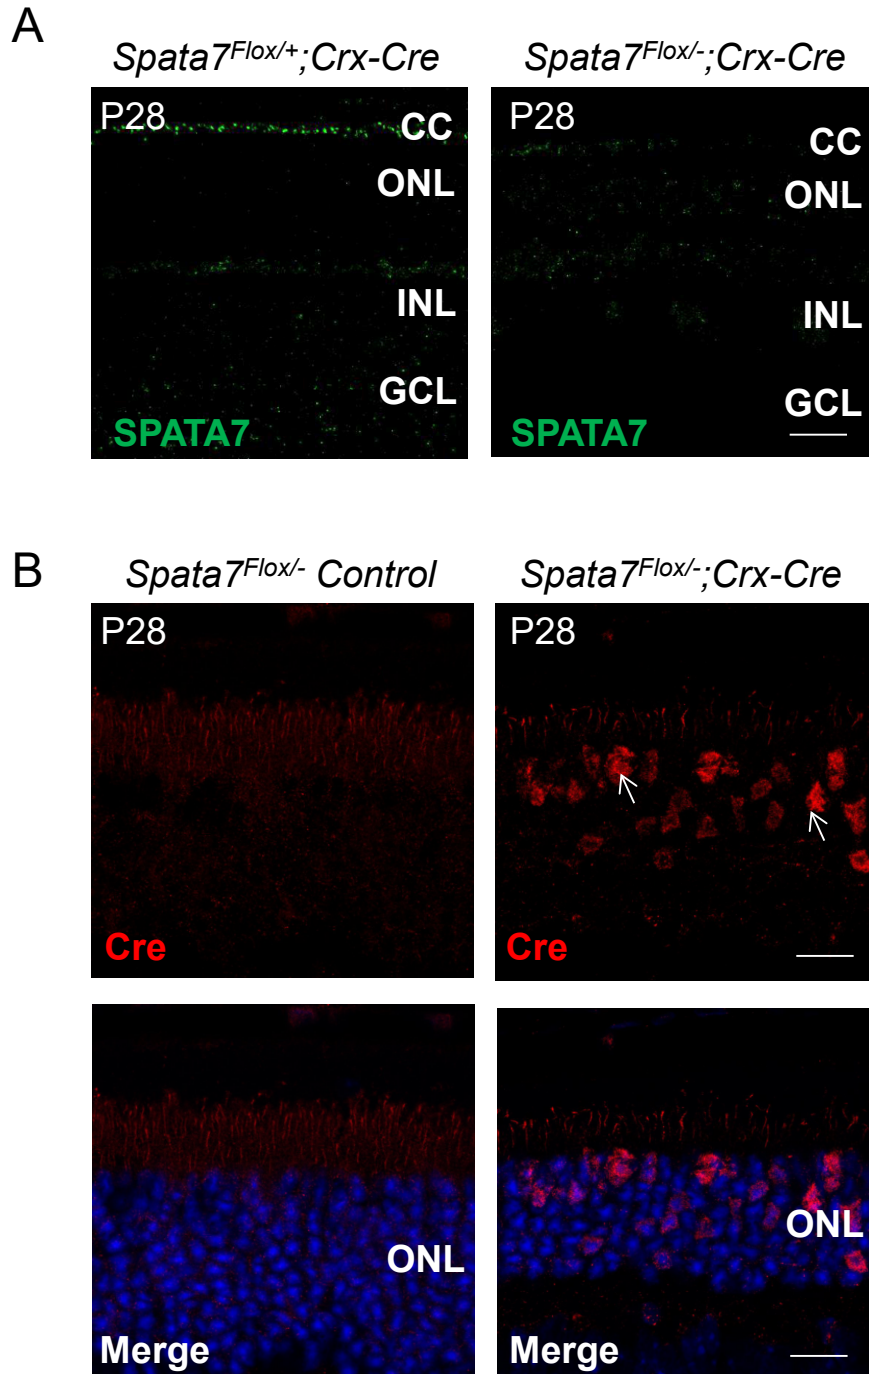

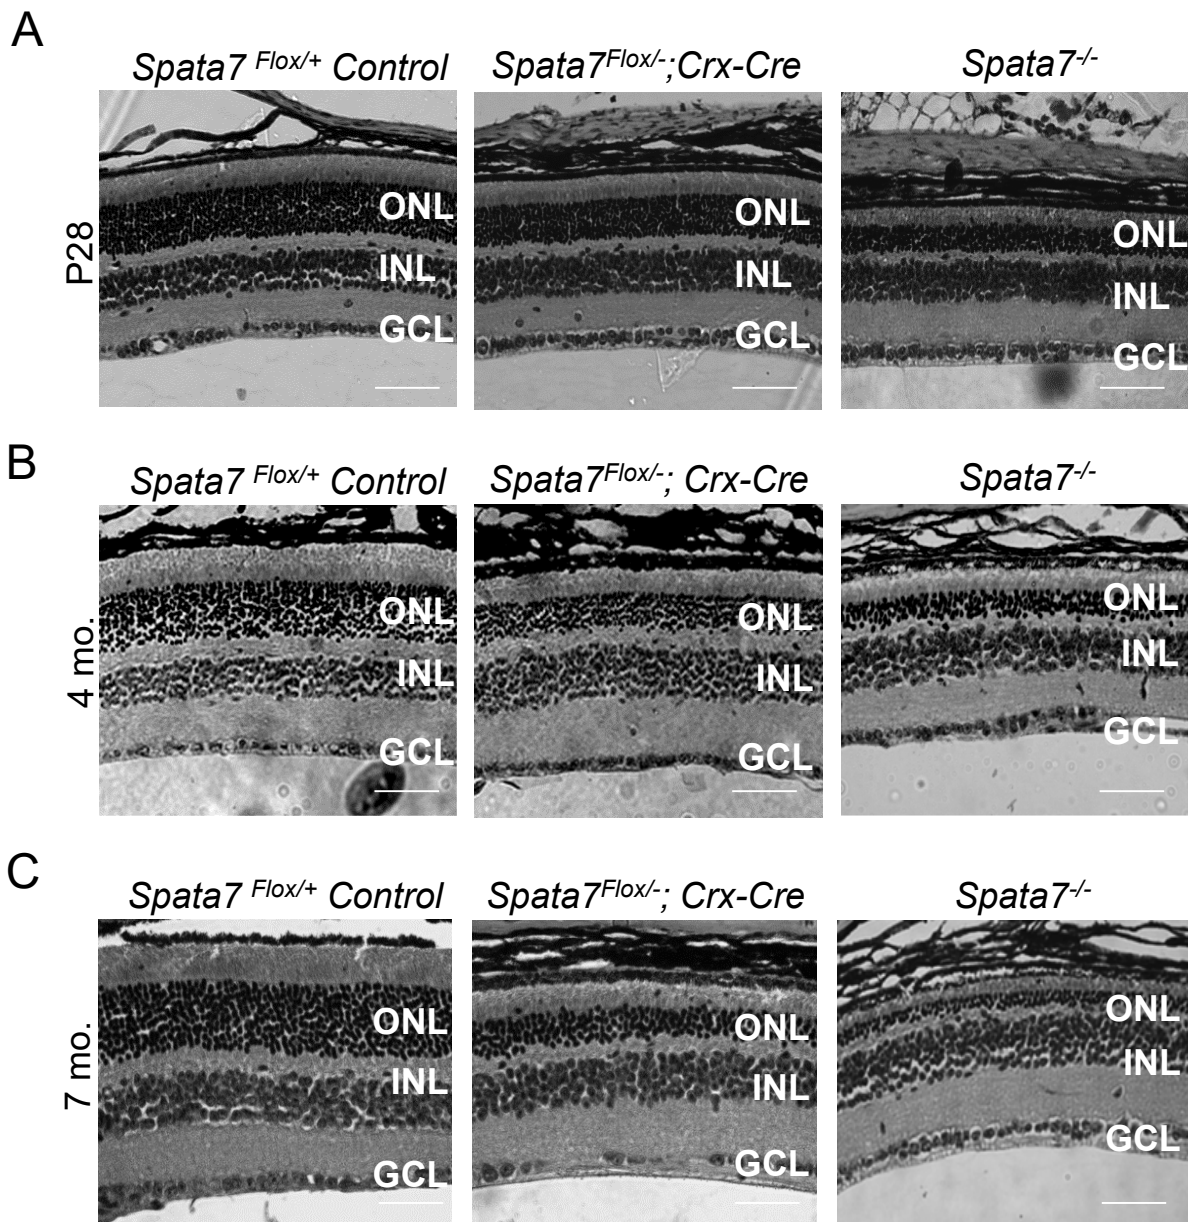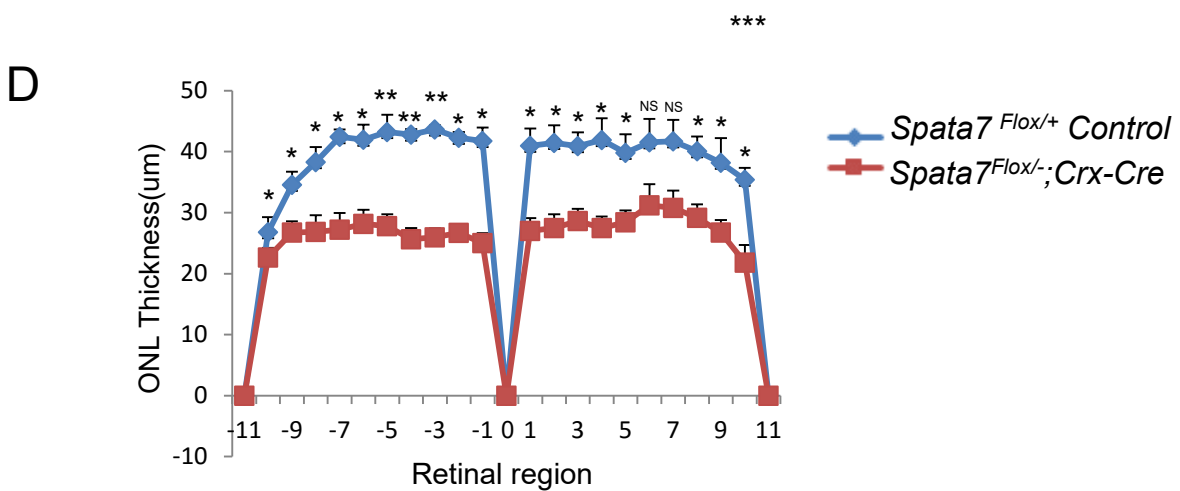

1 month

A

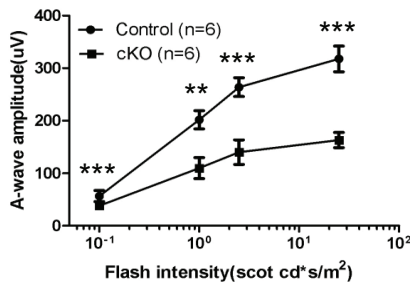

B

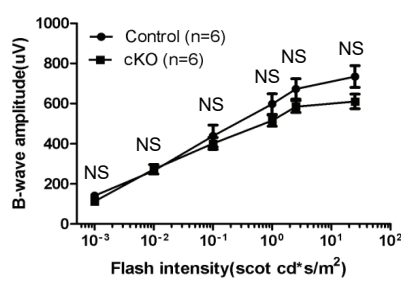

C

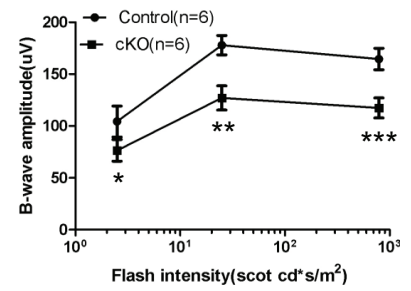

4 months

D

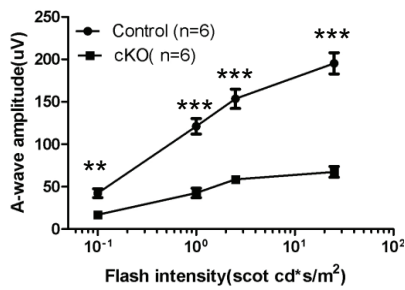

E

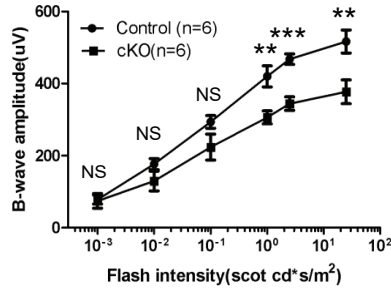

F

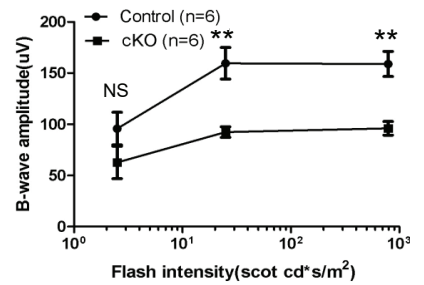

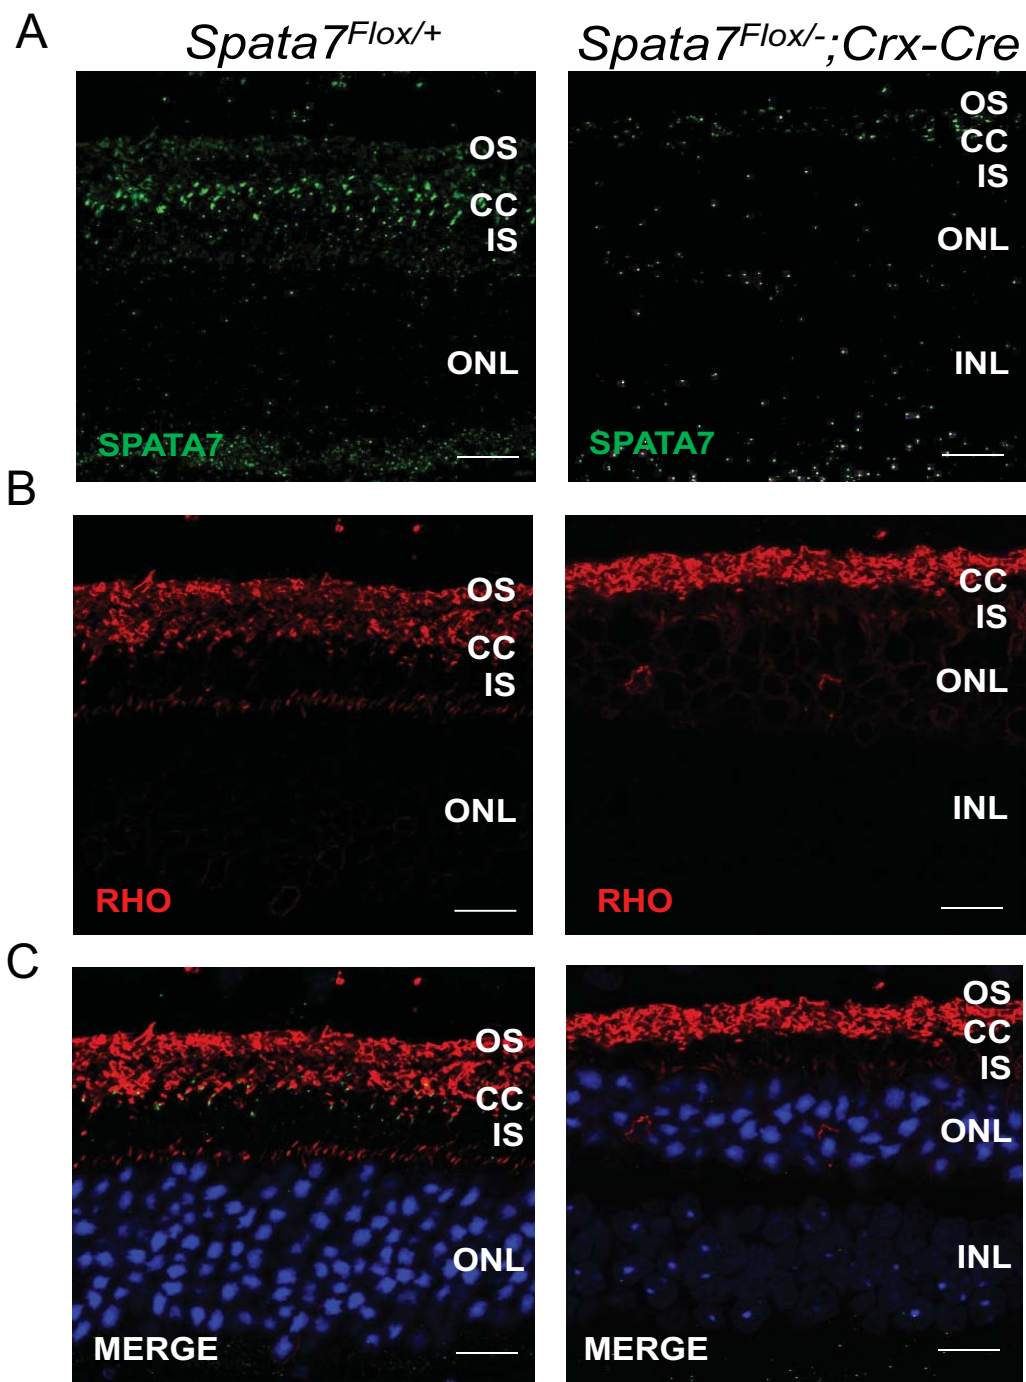

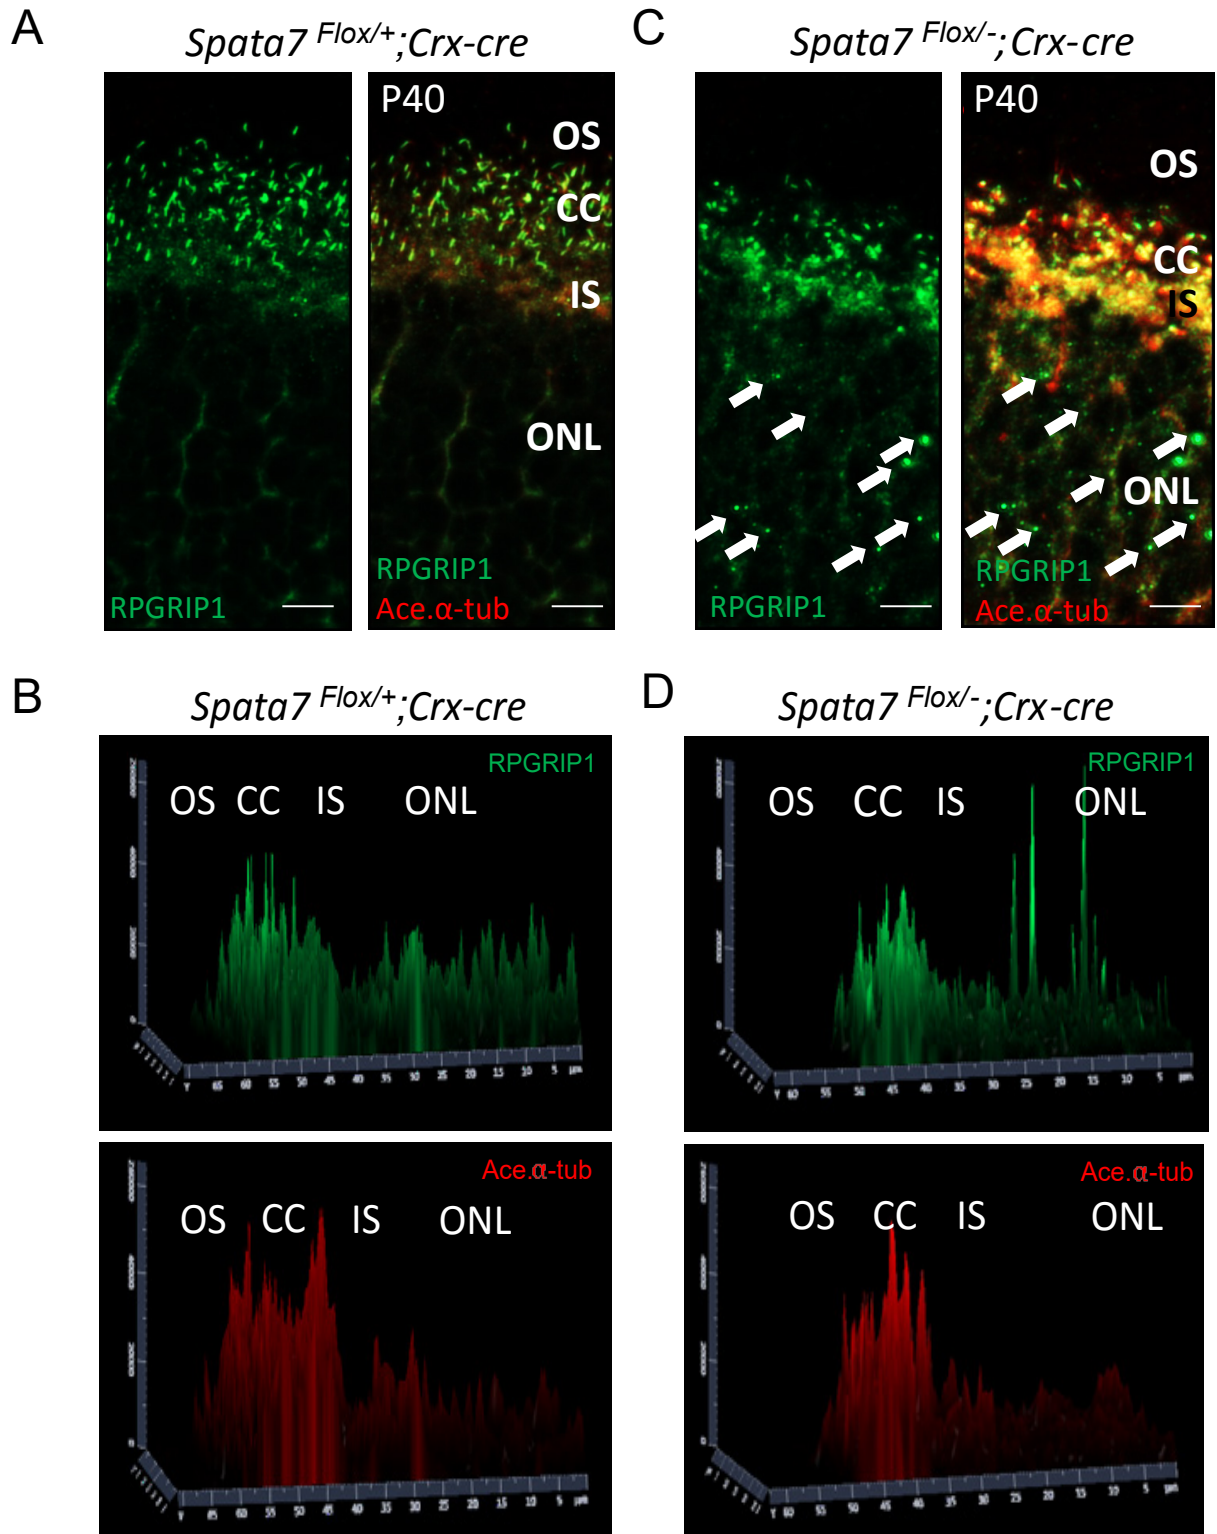

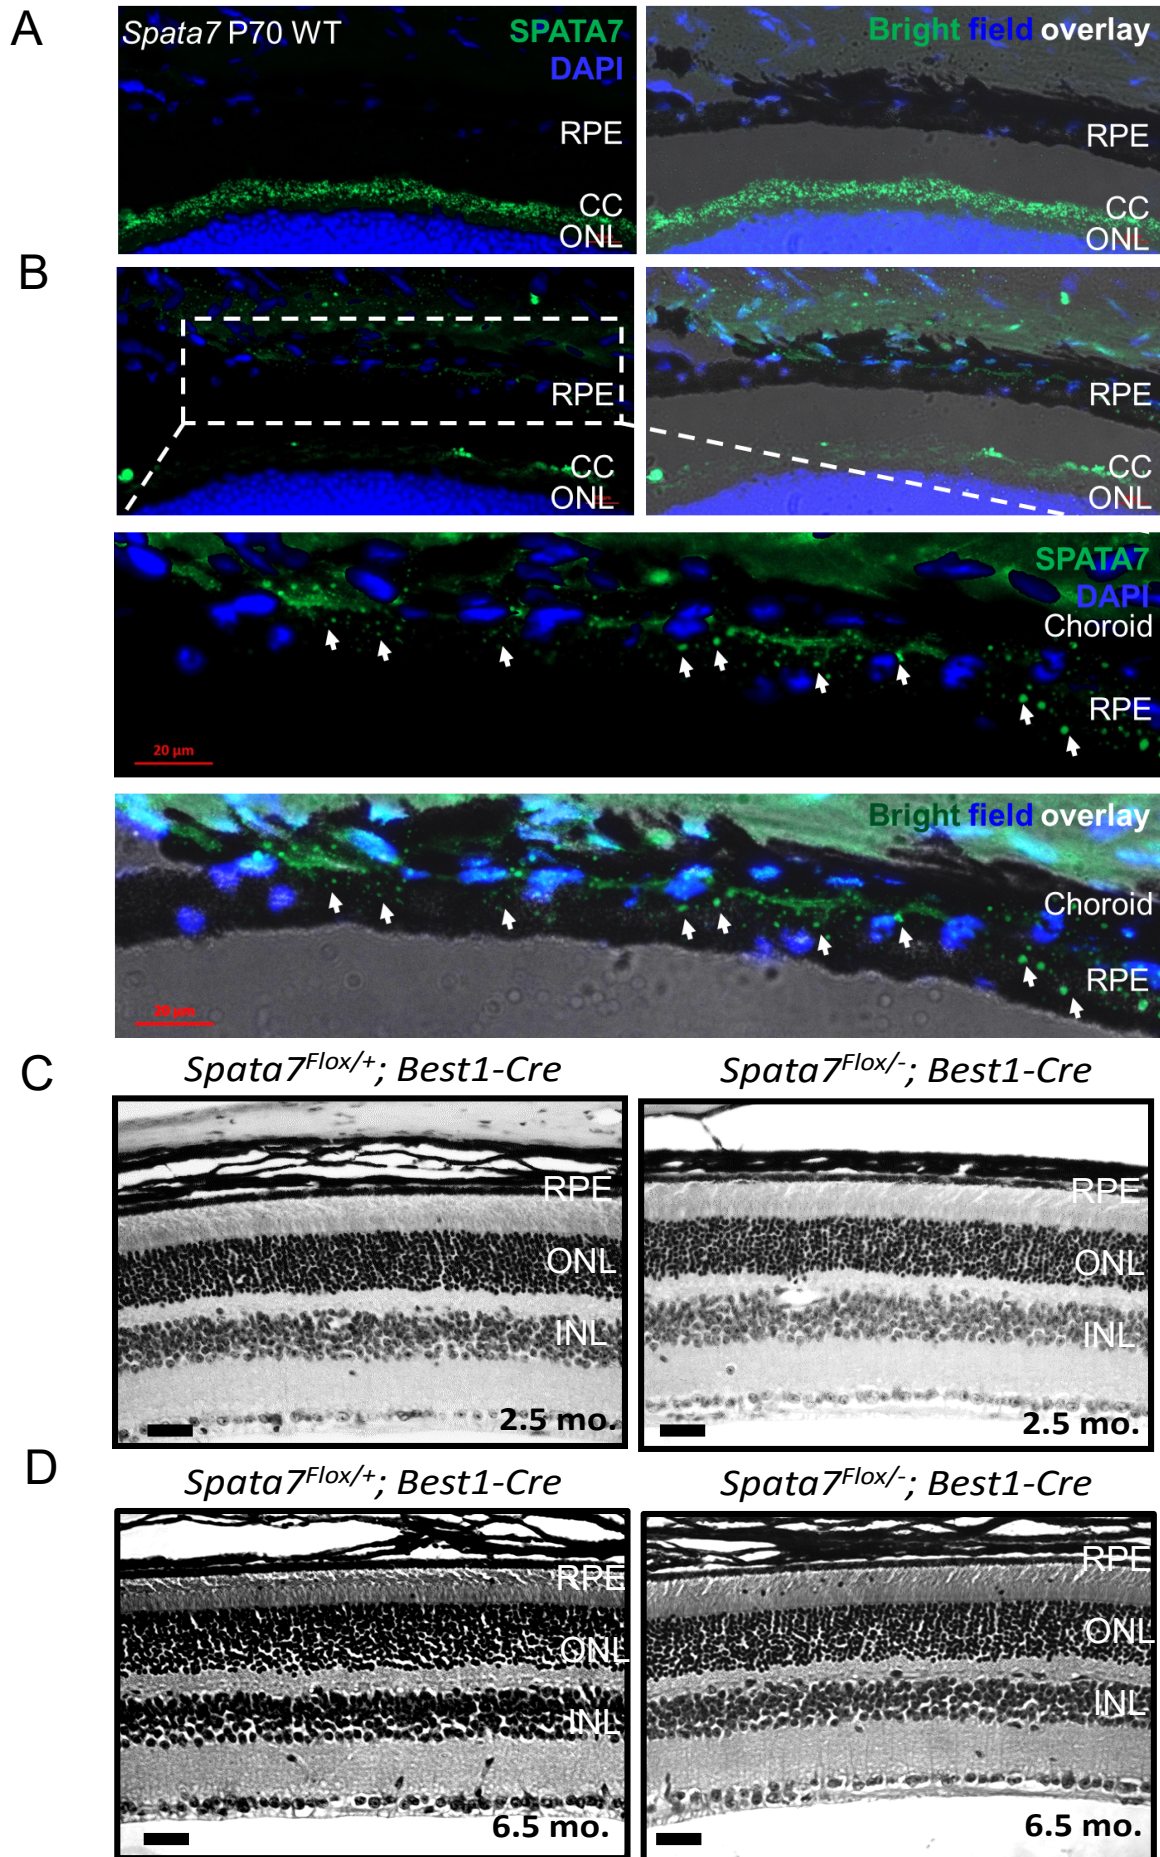

Supplement: NIHMS918212-supplement-1.pdf [file NIHMS918212-supplement-1.pdf]

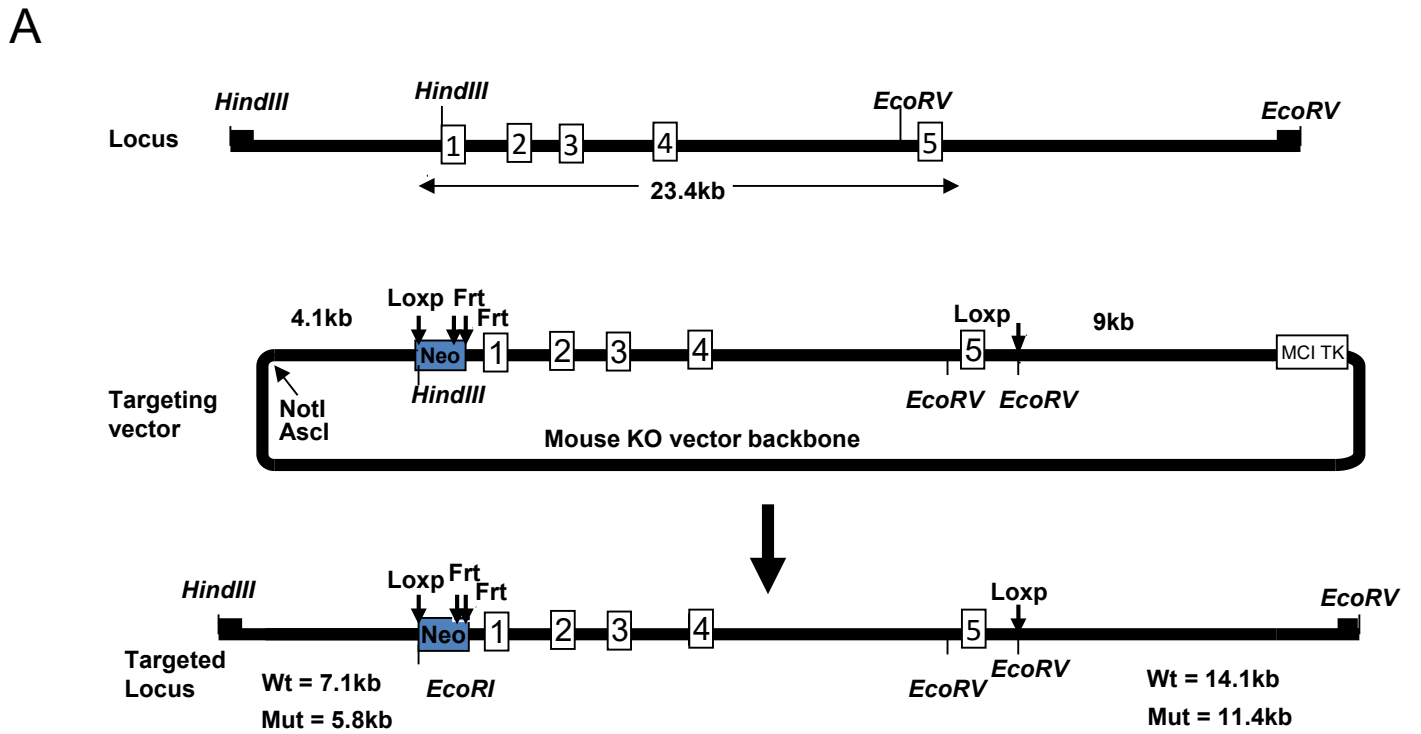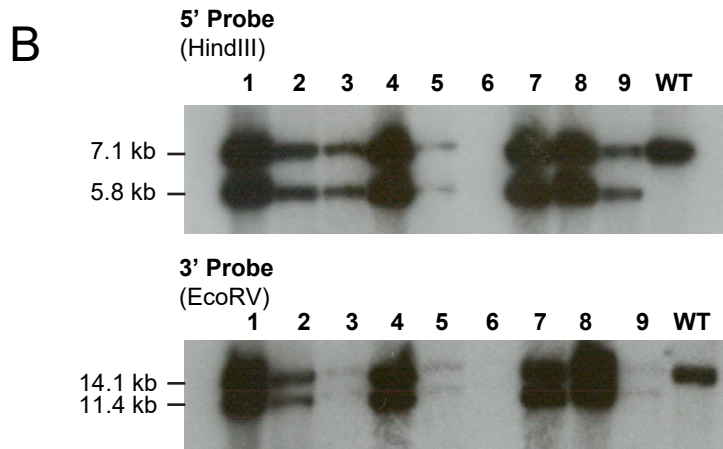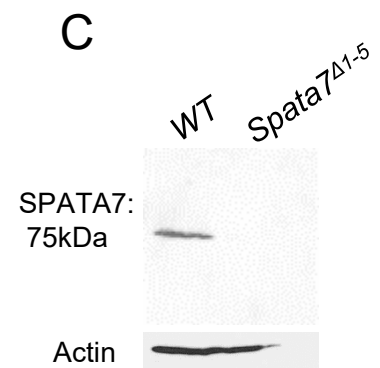



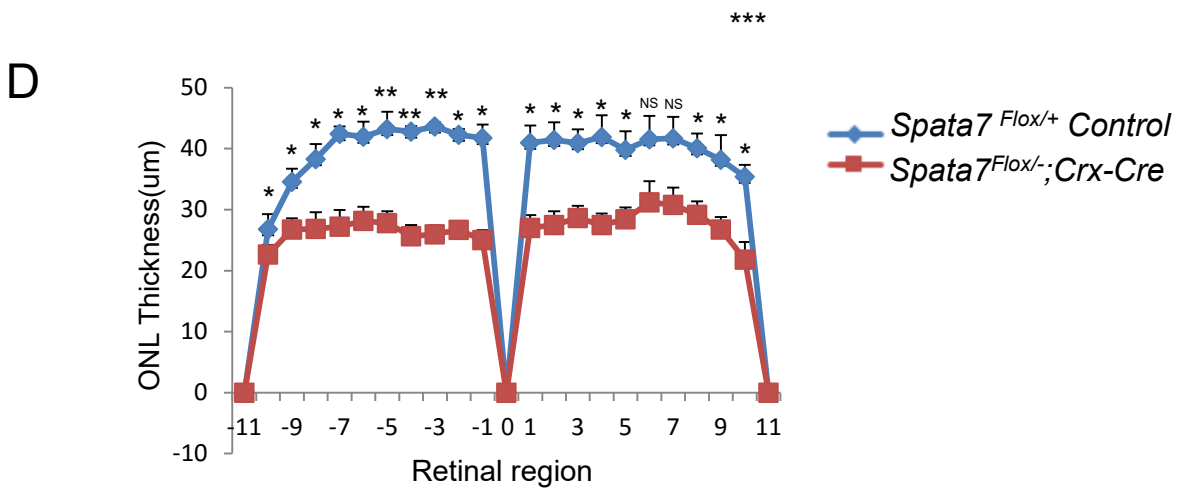

1 month

A

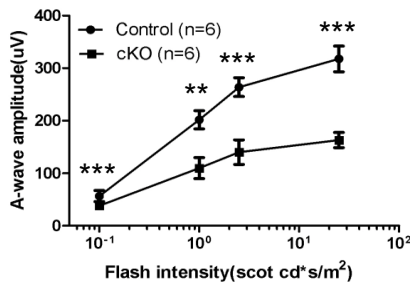

B

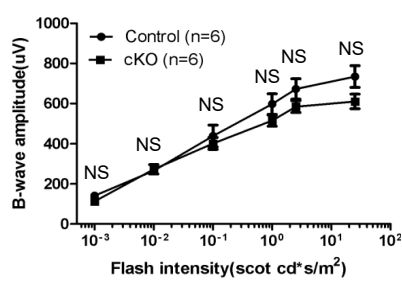

C

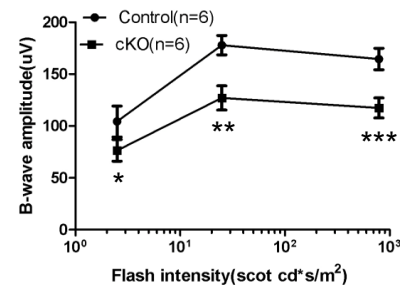

4 months

D

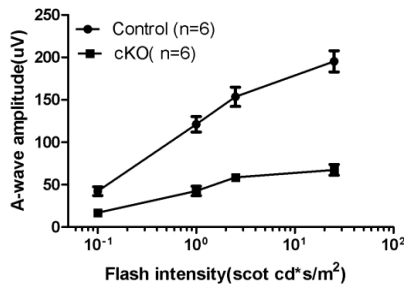

E

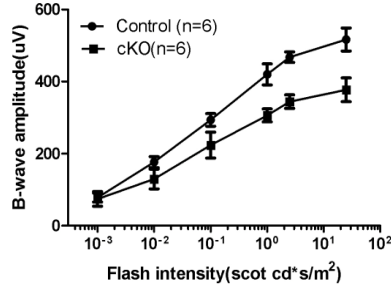

F

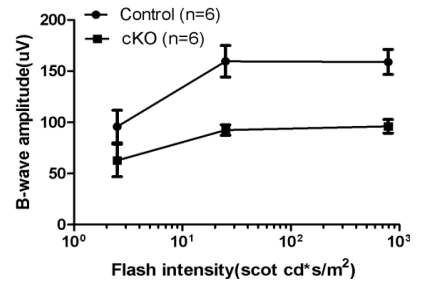

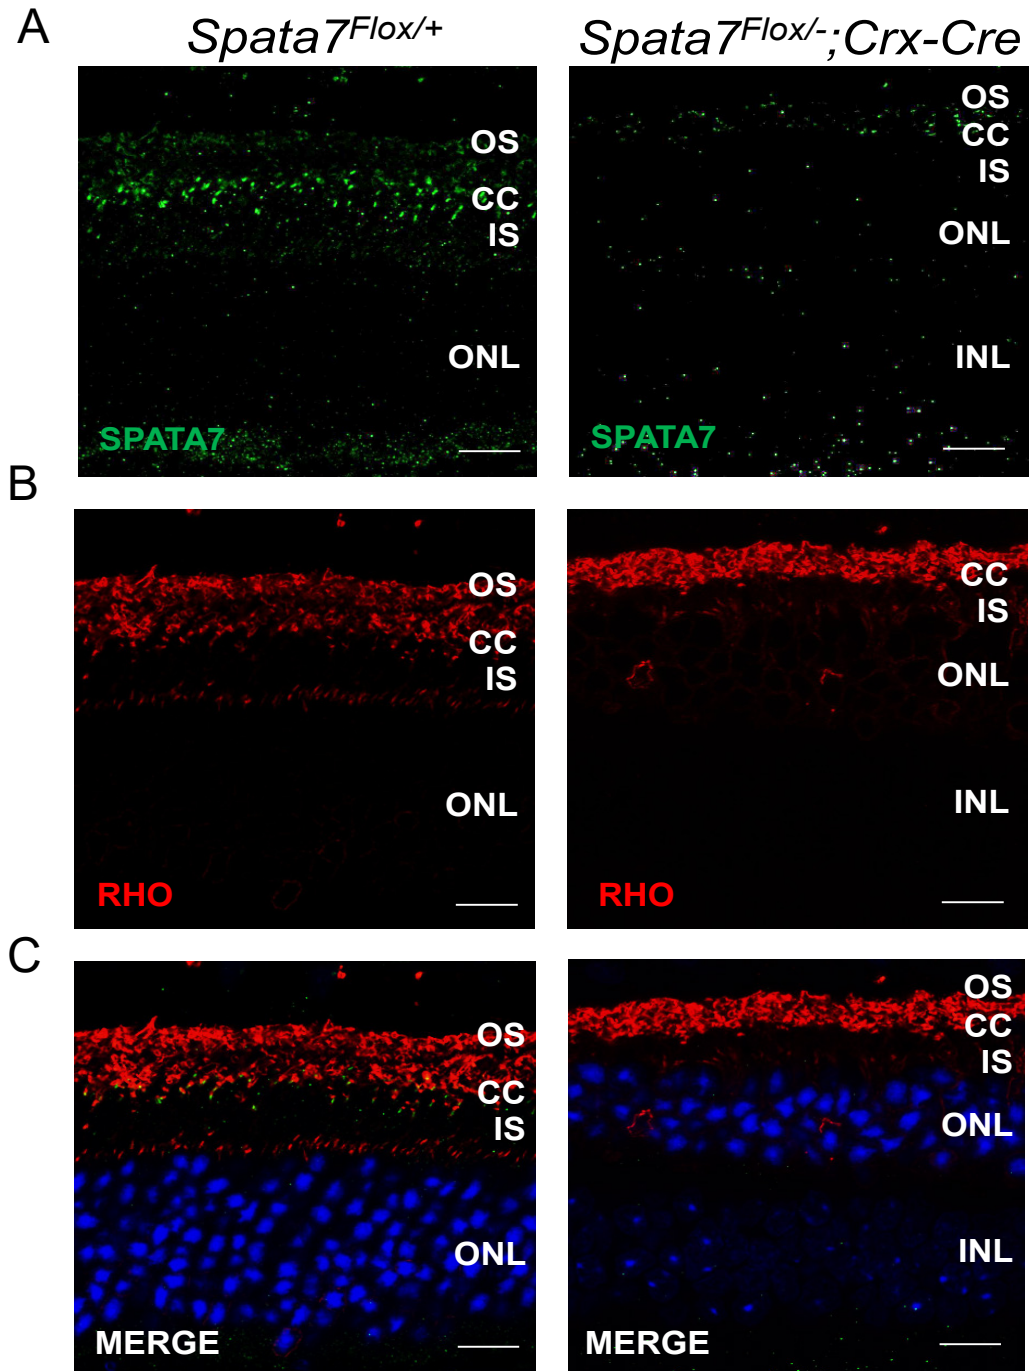



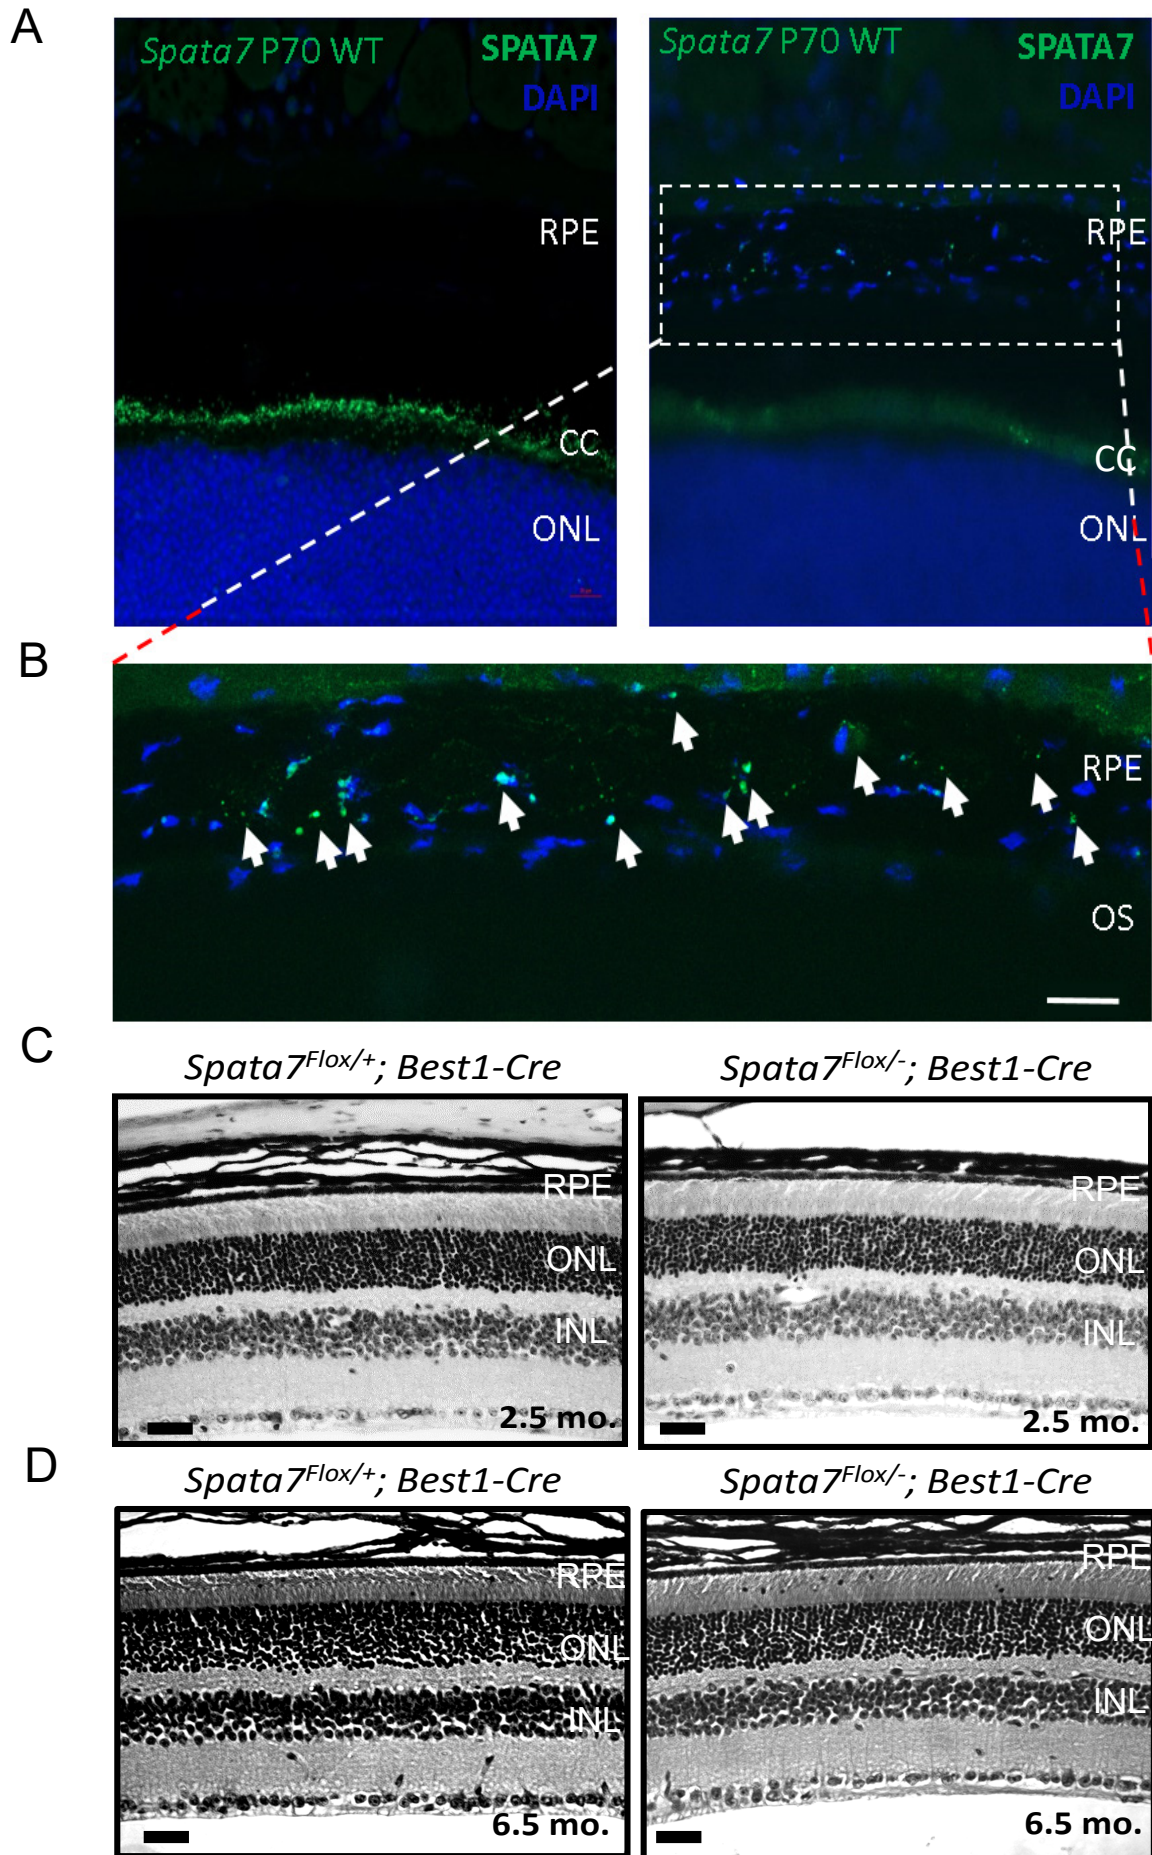

Supplement: NIHMS918212-supplement-6.pdf [file NIHMS918212-supplement-6.pdf]
